# Supplementary material
Source: MDPI journal article supplement (https://www.mdpi.com/2073-4344/12/11/1440)
Supplement: s1 [file s1]

Supporting information

# Boosting the Photoelectrochemical Water Oxidation Performance of TiO<sub>2</sub> Nanotubes by Surface Modification Using Silver Phosphate

**Prabhakarn Arunachalam<sup>1,\*</sup>, Mabrook S Amer<sup>1,2,\*</sup>, Haneen A. AlOraij<sup>1</sup>, Abdullah M. Al-Mayouf<sup>1,2</sup>, Mahmoud Hezam<sup>3,4</sup> and Matar Al-Shalwi<sup>1</sup>**

<sup>1</sup> Electrochemical Sciences Research Chair, Department of Chemistry, Science College, King Saud University, Riyadh 11451, Saudi Arabia

<sup>2</sup> K.A.CARE Energy Research and Innovation Center at Riyadh, Riyadh 11451, Saudi Arabia

<sup>3</sup> King Abdullah Institute for Nanotechnology, King Saud University, Riyadh 11451, Saudi Arabia

<sup>4</sup> Physics Department, College of Science, Imam Mohammad Ibn Saud Islamic University (IMSIU), Riyadh 13318, Saudi Arabia

\* Correspondence: parunachalam@ksu.edu.sa (P.A.); msamer@ksu.edu.sa (M.S.A.); Tel.: +966-114696026 (P.A.)

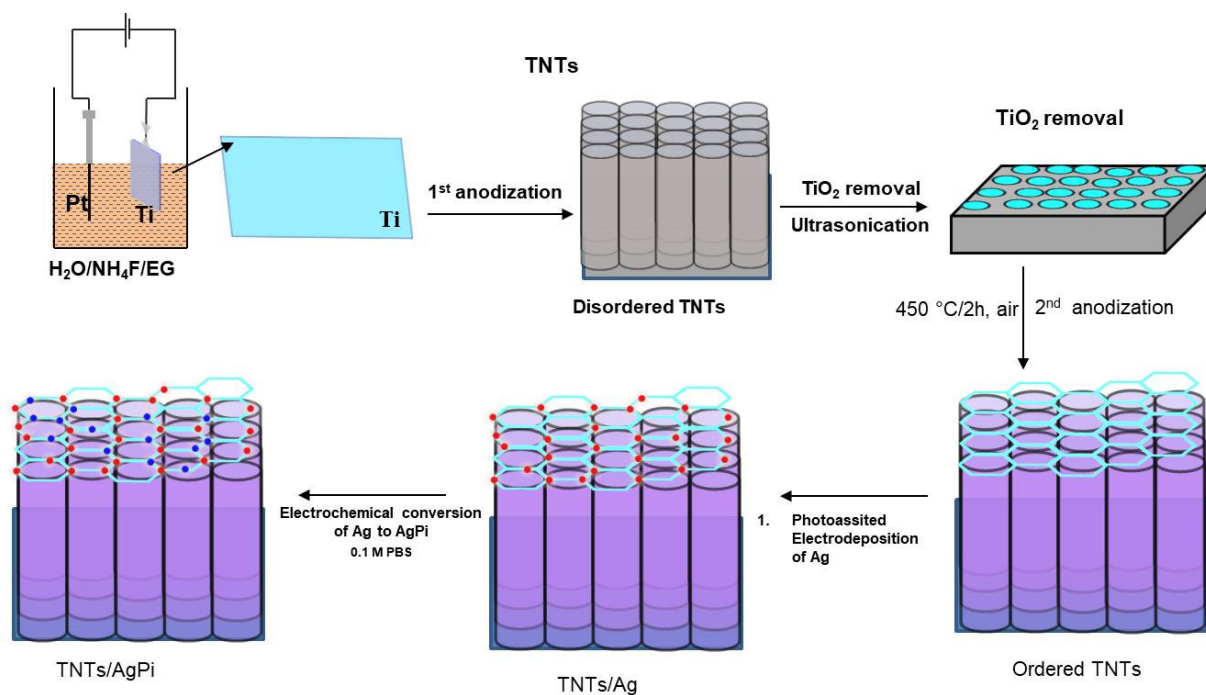

**Figure S1.** Fabrication of TNTs/AgPi photoanodes. Schematic representation of AgPi loading on TNTs photoanodes prepared by a twostep anodization process.

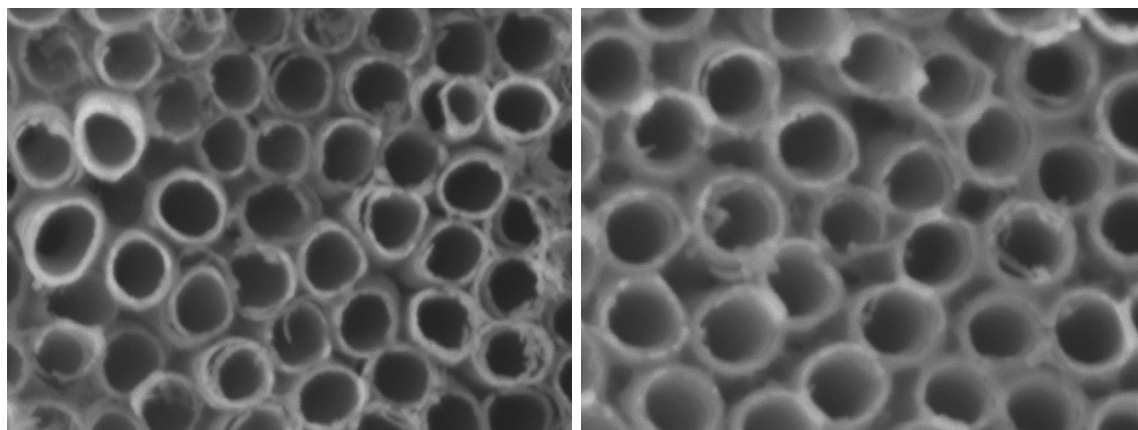

**Figure S2.** FESEM image of the TNTs/AgPi photoanode taken before (a) after J-t (b) measurement for 8 h in 0.1 M PBS (pH 7.5).

**Table S1.** Recent advances in reported TNTs-based photoelectrodes with water oxidation catalytic materials and their experimental conditions for photoelectrochemical water oxidation reactions.

| S.No | Electrode                                                                        | Electrolyte (pH)                      | Co-catalyst (synthesis, media and deposition time) | Current density (mA/cm <sup>2</sup> )                                                     | Ref.      |
|------|----------------------------------------------------------------------------------|---------------------------------------|----------------------------------------------------|-------------------------------------------------------------------------------------------|-----------|
| 1    | TNTs nanowire/CoPi                                                               | 0.1 M PBS (pH 7)                      | Co-Pi photo-assisted electrodeposition             | ≈ 0.46 at 1.23 V <sub>RHE</sub>                                                           | [1]       |
| 2    | N-modified TiO <sub>2</sub> nanowires (TiO <sub>1.988</sub> N <sub>0.012</sub> ) | 1.0 M KOH                             | Hydrothermal Co and Ag                             | ≈ 0.6 for Co @ ≈ 0.46 for Ag @ 1.23V <sub>RHE</sub>                                       | [2]       |
| 3    | TiO <sub>2</sub> /CdS/Co–Pi Nanowire Array                                       | 0.1 M KPi buffer (pH 7)               | Co-Pi photoassisted electrodeposition              | ≈ 0.4 @ 1.23 V <sub>RHE</sub>                                                             | [3]       |
| 4    | CoPi/nanocrystalline TiO <sub>2</sub> (nc-TiO <sub>2</sub> )                     | 0.5 M NaClO <sub>4</sub>              | Co-Pi (photoassisted electrodeposition)            | 170 μA/cm <sup>2</sup> at 0.6 V vs. Ag/AgCl, 90 μA/cm <sup>2</sup> TiO <sub>2</sub> alone | [4]       |
| 5    | NiFeOH <sub>x</sub> /TiO <sub>2</sub>                                            | 1.0 M KOH (pH 13.6)                   | Electrodeposition                                  | 0.2 @ 1.23 V <sub>RHE</sub>                                                               | [5]       |
| 6    | WO <sub>3</sub> /TiO <sub>2</sub> NTs                                            | 1.0 M KOH                             | Anodization method                                 | 0.62 @ 0.2 V <sub>Ag/AgCl</sub>                                                           | [6]       |
| 7    | Hydrogenated TiO <sub>2</sub> NTs                                                | 1.0 M NaOH /1 wt% of EG               | Electrochemical treatment                          | 0.65 @ 0 V <sub>Ag/AgCl</sub>                                                             | [7]       |
| 8    | B-TiO <sub>2</sub> /Al <sub>2</sub> O <sub>3</sub>                               | 0.1 M Na <sub>2</sub> SO <sub>4</sub> | electrodeposition                                  | 1.2 @ 1.23 V <sub>RHE</sub>                                                               | [8]       |
| 9    | Reduced TiO <sub>2</sub> NTAs                                                    | 1 M NaOH                              | Chemical method                                    | 0.73 @ 1.23 V <sub>RHE</sub>                                                              | [9]       |
| 10   | Ta/TNTs                                                                          | 1 M KOH                               | Electrochemical treatment                          | 0.5 @0.2 V <sub>Ag/AgCl</sub>                                                             | [10]      |
| 11   | TNTs/ZrO <sub>2</sub> Oxygen deficient TNTs/ZrO <sub>2</sub>                     | 0.1 M NaPi buffer pH (7.5)            | Electrodeposition/ Vacuum annealing                | 0.72 mA/cm <sup>2</sup> @ 1.23 V vs RHE                                                   | [11]      |
| 12   | TNTs/NiPi                                                                        | 0.1 M NaPi buffer pH (7.5)            | Electrodeposition                                  | 0.92 mA/cm <sup>2</sup> @ 1.23 V vs RHE                                                   | [12]      |
| 13   | TNTs /ZrO <sub>2</sub> /CoPi Electrodeposition                                   | 0.1 M NaPi buffer pH (7.5)            | Co-Pi photo-assisted electrodeposition             | ≈ 0.86 mA/cm <sup>2</sup> at 1.23 V vs RHE                                                | [13]      |
| 14   | TNTs/AgPi                                                                        | 0.1 M NaPi buffer pH (7.5)            | Photodeposition                                    | 0.74 mA/cm <sup>2</sup> at 1.23 V vs. RHE                                                 | This work |

**Table S2.** Impedance parameter values derived from the fitting to the equivalent circuit for the impedance spectra were examined under constant illumination conditions at 1.0 V vs. RHE.

| Sample             | $R_s$         | $Q_{PL}$             | $R_{PL}$        | $Q_{BL}$             | $R_{BL}$      |
|--------------------|---------------|----------------------|-----------------|----------------------|---------------|
| TNTs light         | 39.3 $\Omega$ | 3.18 $\mu\text{Mho}$ | 624 k $\Omega$  | 55.6 $\mu\text{Mho}$ | 34 k $\Omega$ |
| TNTs/AgPi<br>light | 33.4 $\Omega$ | 2.80 $\mu\text{Mho}$ | 5.39 k $\Omega$ | 12.2 $\mu\text{Mho}$ | 17.4          |

## References

1. Ai, G.; Mo, R.; Li, H.; Zhong, J. Cobalt phosphate modified TiO<sub>2</sub> nanowire arrays as co-catalysts for solar water splitting. *Nanoscale* **2015**, *7*, 6722–6728.
2. Hoang, S.; Guo, S.; Hahn, N.T.; Bard, A.J.; Mullins, C.B. Visible Light Driven Photoelectrochemical Water Oxidation on Nitrogen-Modified TiO<sub>2</sub> Nanowires. *Nano Lett.* **2012**, *12*, 26–32.
3. Ai, G.; Li, H.; Liu, S.; Mo, R.; Zhong, J. Solar Water Splitting by TiO<sub>2</sub>/CdS/Co–Pi Nanowire Array Photoanode Enhanced with Co–Pi as Hole Transfer Relay and CdS as Light Absorber. *Adv. Funct. Mat.* **2015**, *25*, 5706–5713.
4. Liu, D.; Jing, L.; Luan, P.; Tang, J.; Fu, H. Enhancement effects of cobalt phosphate modification on activity for photoelectrochemical water oxidation of TiO<sub>2</sub> and mechanism insights. *ACS Appl. Mater. Interfaces* **2013**, *5*, 4046–4052.
5. Xu, Y.; Ahmed, R.; Lin, Q.; Zangari, G. (Photo) electrochemical water oxidation at anodic TiO<sub>2</sub> nanotubes modified by electrodeposited NiFe oxy-hydroxides catalysts. *Electrochim. Acta* **2019**, *308*, 91–98.
6. Momeni, M.M.; Ghayeb, Y.; Davarzadeh, M. Single-step electrochemical anodization for synthesis of hierarchical WO<sub>3</sub>–TiO<sub>2</sub> nanotube arrays on titanium foil as a good photoanode for water splitting with visible light. *J. Electroanal. Chem.* **2015**, *739*, 149–155.
7. Xu, C.; Song, Y.; Lu, L.; Cheng, C.; Liu, D.; Fang, X.; Chen, X.; Zhu, X.; Li, D. Electrochemically hydrogenated TiO<sub>2</sub> nanotubes with improved photoelectrochemical water splitting performance. *Nanoscale Res Lett* **2013**, *8*, 1–7.
8. Liu, C.; Zhang, C.; Yin, G.; Zhang, T.; Wang, W.; Ou, G.; Jin, H.; Chen, Z. A Three-Dimensional Branched TiO<sub>2</sub> Photoanode with an Ultrathin Al<sub>2</sub>O<sub>3</sub> Passivation Layer and a NiOOH Cocatalyst toward Photoelectrochemical Water Oxidation. *ACS Appl. Mater. Interfaces* **2021**, *13*, 13301–13310.
9. Kang, Q.; Cao, J.; Zhang, Y.; Liu, L.; Xu, H.; Ye, J. Reduced TiO<sub>2</sub> nanotube arrays for photoelectrochemical water splitting. *J. Mat. Chem. A* **2013**, *1*, 5766–5774.
10. Altomare, M.; Lee, K.; Killian, M.S.; Selli, E.; Schmuki, P. Ta-Doped TiO<sub>2</sub> Nanotubes for Enhanced Solar-Light Photoelectrochemical Water Splitting. *Eur. J. Chem.* **2013**, *19*, 5841–5844.
11. Shaddad, M.N.; Ghanem, M.A.; Al-Mayouf, A.M.; Gimenez, S.; Bisquert, J.; Herraiz-Cardona, I. Cooperative Catalytic Effect of ZrO<sub>2</sub> and  $\alpha$ -Fe<sub>2</sub>O<sub>3</sub> Nanoparticles on BiVO<sub>4</sub> Photoanodes for Enhanced Photoelectrochemical Water Splitting. *ChemSusChem* **2016**, *9*, 2779–2783.
12. Arunachalam, P.; AlOraij, H.A.; Amer, M.S.; Hezam, M.; Shaddad, M.N.; Madhavan, J. Activation effect of nickel phosphate co-catalysts on the photoelectrochemical water oxidation performance of TiO<sub>2</sub> nanotubes. *J. Saudi Chem. Soc.* **2022**, *26*, 101484.
13. Shaddad, M.N.; Arunachalam, P.; Amer, M.S.; Al-Mayouf, A. M.; Hezam, M.; AlOraij, H.A.; Gimenez, S. Exploiting the synergistic catalytic effects of CoPi nanostructures on Zr-doped highly ordered TiO<sub>2</sub> nanotubes for efficient solar water oxidation. *Int. J. Energy Res.* **2022**, *46*, 12608–12622.
